# Supplementary material
Source: PubMed Central journal article supplement (PMC4030414)
Supplement: NIHMS576558-supplement.pdf [file NIHMS576558-supplement.pdf]

## **Supplemental Materials and Methods:**

*Reagents.* Concanavalin A, LPS from *Salmonella typhimurium* and diphtheria toxin from *Corynebacterium diphtheriae* were from Sigma. Rho family GTPase inhibitor, Toxin B (TB) from *Clostridium difficile* was from Calbiochem. The recombinant mouse IL-4 and GM-CSF were from Peprotech. Paclitaxel was from Mayne Pharma. Fluorescein-conjugated mAbs to I-A<sup>b</sup>, CD86, CD40, CD11c, CD11b, CD4, PDCA1, F4/80, CD205, CD103 and isotype-matched control mAbs were from BD Pharmingen. FITC anti-mouse Ly-6G/Ly-6C (GR-1), APC anti-mouse CD25 Abs and PE anti-mouse FoxP3 Flow Kit were from BioLegend. For MDSC depletion, anti-mouse GR-1(Clonc RB6-8C5) Abs were purchased from eBioscience. Anti-Foxo3 Abs were a gift from Dr. Arthur Hurwitz (NIH, NCI).

*Cell cultures and sorting.* Murine 3LL (Lewis lung carcinoma) and B16 (melanoma) tumor cell lines were from ATCC. DC were generated from bone marrow hematopoietic precursors isolated from wild type and TLR4<sup>-/-</sup> mice and cultured in complete medium containing GM-CSF and IL-4 (1000 U/ml) for 7 days as described earlier.<sup>49</sup>. Immature DC were harvested on Day 5. DC phenotype was assessed by flow cytometry (FACSCalibur, BD) and data analysis was performed using FlowJo software.

For the *in vitro* studies, DC were pretreated for 48h with (i) 1nM paclitaxel, (ii) tumor-conditioned medium (TCM) (25% v/v) or (iii) both paclitaxel and TCM. DC treated with TCM were cell sorted (BD FACSARIA) and CD11c<sup>low</sup>CD11b<sup>high</sup> regDC and CD11c<sup>high</sup>CD11b<sup>low/neg</sup> cDC subsets were isolated for the *in vivo* and *in vitro* experiments.

For the *ex vivo* studies, CD11c<sup>high</sup> cDC and CD11b<sup>+</sup>GR-1<sup>+</sup> MDSC were sorted (FACSARIA) from the lungs of tumor-free mice and cultured (5x10<sup>5</sup> cells/ml) with 3LL cells (2x10<sup>4</sup>/ml, inserts 0.2µm pore) for 72h. GM-CSF (50 ng/ml) was added to support cell viability. The cultures were harvested on D3 and analyzed by flow cytometry and in functional assays.

For adaptive transfer of MDSC, to determine MDSC→regDC differentiation *in vivo*, MDSC were sorted from the bone marrow (MDCS Isolation Kit, Miltenyi Biotec), labeled with CFDA SE (Cell Tracer Kit, Invitrogen) and injected i.p. (10x10<sup>6</sup>/mouse) in 3LL-bearing mice two weeks after inoculation of tumor cells. Cells from the lung and spleen were analyzed for the presence of CFDA SE (FL1) positive regDC by flow cytometry in 3-5 days.

*T cell proliferation.* Splenocytes (2x10<sup>6</sup>/ml) from control mice were pre-activated for 5 h with 2.5µg/ml ConA and seeded at 2x10<sup>5</sup>/100µl in 96-well U-bottom plates. Bone-marrow-derived mature and immature syngeneic cDC and CD11c<sup>+</sup> DC isolated by MACS cell sorting (Miltenyi Biotec) from spleens of tumor-free and 3LL-bearing mice served as controls. cDC and regDC, separated by cell sorting (FACSARIA) from cultured 3LL-treated DC or from lungs and spleens of tumor-bearing mice, were added in triplicates at 1:10; 1:30 and 1:100 ratios to pre-activated T cells. T cell proliferation (48h) was measured by uptake of <sup>3</sup>H-thymidine (1 µCi/well, 5 Ci/mmol; DuPont-NEN) pulsed for 16-18h using MicroBeta TRILUX counter (WALLAC) and expressed as count per minute (cpm).

*Western blot.* DC were treated with medium, Toxin B (0.2ng/ml, 30min) and 3LL-TCM, washed, homogenized and centrifuged at 100000g for 60min, 4°C. Cytosolic fractions and membrane pellets were re-suspended in lysis buffer and Laemmli sample buffer. Samples from the same

number of cells ( $1 \times 10^6$  cells) were normalized by the protein concentration, resolved by electrophoresis on 12% SDS-PAAG and transferred to PVDF membranes (Invitrogen). The membranes were incubated with a blocking buffer (0.1% Tween-20 and 5% milk) before probing with anti-Cdc42 mAbs (Transduction Laboratories). After incubation with a horseradish peroxidase-conjugated secondary Abs (Pierce), bound Abs were visualized with an enhanced chemiluminescence detection system.  $\beta$ -actin (Sigma) served as a housekeeping marker. Gels were scanned and analyzed by Un-Scan-It Gel software (Silk Scientific, Inc).

*IFN- $\gamma$  assay.* T cells ( $1 \times 10^6$ /ml) isolated from spleens of control and tumor-bearing mice were stimulated with irradiated (300 Gy) 3LL or unrelated tumor cells ( $0.2 \times 10^6$ /ml). Supernatants were collected 48h later and the levels of IFN- $\gamma$  were assessed by ELISA (R&D System).

**Supplemental Table I. Emergence of immune regulatory cells in the tumor environment *in vivo* in different tumor models**

|               | B16 melanoma |        |               |        |              |              | 3LL Lewis lung carcinoma |      |               |              |       |               |
|---------------|--------------|--------|---------------|--------|--------------|--------------|--------------------------|------|---------------|--------------|-------|---------------|
|               | Lung         |        |               | Spleen |              |              | Lung                     |      |               | Spleen       |       |               |
|               | MDSC         | Treg   | regDC         | MDSC   | Treg         | regDC        | MDSC                     | Treg | regDC         | MDSC         | Treg  | regDC         |
| <b>Week 1</b> | 123.2        | <0.1** | <b>143.6</b>  | 93.3   | 97.3         | 88.5         | 108.6                    | <0.1 | <b>461.7</b>  | 94.9         | 105.2 | <b>170.2</b>  |
|               | ±            |        | ±             | ±      | ±            | ±            | ±                        |      | ±             | ±            | ±     | ±             |
|               | 17.3         |        | <b>19.0</b>   | 2.4    | 10.8         | 10.1         | 6.4                      |      | <b>65.1</b>   | 8.5          | 5.2   | <b>27.2</b>   |
| <b>Week 2</b> | <b>136.4</b> | <0.1   | <b>147.7</b>  | 98.1   | <b>129.9</b> | <b>248.9</b> | 103.5                    | <0.1 | <b>1521.2</b> | 103.3        | 93.1  | <b>640.4</b>  |
|               | ±            |        | ±             | ±      | ±            | ±            | ±                        |      | ±             | ±            | ±     | ±             |
|               | <b>17.5*</b> |        | <b>12.7</b>   | 13.3   | <b>7.4</b>   | <b>22.9</b>  | 5.3                      |      | <b>111.0</b>  | 1.6          | 12.1  | <b>54.6</b>   |
| <b>Week 3</b> | <b>316.9</b> | <0.1   | <b>188.8</b>  | 109.9  | <b>146.8</b> | <b>402.8</b> | <b>276.6</b>             | <0.1 | <b>1858.3</b> | <b>544.1</b> | 102.1 | <b>1706.7</b> |
|               | ±            |        | ±             | ±      | ±            | ±            | ±                        |      | ±             | ±            | ±     | ±             |
|               | <b>16.7</b>  |        | <b>10.2.0</b> | 6.9    | <b>12.4</b>  | <b>17.6</b>  | <b>25.4</b>              |      | <b>200.2</b>  | <b>32.1</b>  | 7.2   | <b>215.6</b>  |

C57BL/6 mice received i.v. injection of B16 melanoma or 3LL lung carcinoma cells as described in M&M. One, two and three weeks later, lungs and spleens were harvested, single cell suspensions were prepared and cells were stained with FITC-, PE- and APC-conjugated antibodies specific for markers associated with MDSC, Treg cells and regDC subsets. Cells were analyzed by flow cytometry. The results are presented as the percentage of GR1<sup>+</sup>CD11b<sup>+</sup> (MDSC), CD4<sup>+</sup>CD25<sup>+</sup>FoxP3<sup>+</sup> (Treg) and CD11c<sup>low</sup>CD11b<sup>high</sup> (regDC) cells in the lungs and spleens of tumor-bearing mice relative to their percentage in the lungs and spleens of control tumor-free mice. Data are shown as the mean ± SEM. \*, p<0.05 (ANOVA, N=4-6) shown in bold. \*\*, Treg cells were detected in the lungs in neither control nor tumor-bearing mice.
